# Supplementary material for: Correlation of cellular traction forces and dissociation kinetics of adhesive protein zyxin revealed by multi-parametric live cell microscopy
Source: PubMed Central journal article supplement (PMC8112686; doi:10.1371/journal.pone.0251411), 2021-05-11
Supplement: pone.0251411.s004.pdf [file pone.0251411.s004.pdf]

**S1 Table. Zyxin dynamics evaluated by pointFCS in HC11 cells cultivated on 13 kPa PAA substrates and on coverslips.**

|                   | <b>N</b> | $D_1$ ( $\mu\text{m}^2/\text{s}$ ) | $G_{o1}$              | $D_2$ ( $\mu\text{m}^2/\text{s}$ ) | $G_{o2}$            |
|-------------------|----------|------------------------------------|-----------------------|------------------------------------|---------------------|
| <b>13 kPa PAA</b> | 11       |                                    |                       |                                    |                     |
| 1-component       |          | $11.5 \pm 3.3$                     | $0.00046 \pm 0.00003$ |                                    |                     |
| 2-components      |          | $11.5 \pm 3.3$                     | $0.00046 \pm 0.00003$ | *                                  | -                   |
| <b>Coverslips</b> | 8        |                                    |                       |                                    |                     |
| 1-component       |          | $11.7 \pm 1.1$                     | $0.00195 \pm 0.00005$ |                                    |                     |
| 2-components      |          | $15.8 \pm 3.3$                     | $0.0018 \pm 0.0001$   | $0.34 \pm 0.90$                    | $0.0004 \pm 0.0025$ |

Fitting parameters for FCS experiments, by 1- or 2- component model, Eq. 3. Average autocorrelation amplitude,  $G_{oi}$ , and diffusion coefficient,  $D_i$ , obtained from data fitting of N experiments. \* Two component model fit gives the same diffusive component ( $D_1 = D_2$ ).
